# Supplementary material for: Projections of Cause-Specific Mortality and Demographic Changes under Climate Change in the Lisbon Metropolitan Area: A Modelling Framework
Source: MDPI journal article supplement (doi:10.3390/atmos14050775), 2023-04-24
Supplement: s1 [file s1]

## Supplementary Materials:

# Projections of Cause-Specific Mortality and Demographic Changes under Climate Change in the Lisbon Metropolitan Area: A Modelling Framework

Mónica Rodrigues\*

Department of Geography and Tourism, Centre of Studies on Geography and Spatial Planning, University of Coimbra, 3004-530 Coimbra, Portugal.

\* Correspondence: monica.a.rodrigues@hotmail.com

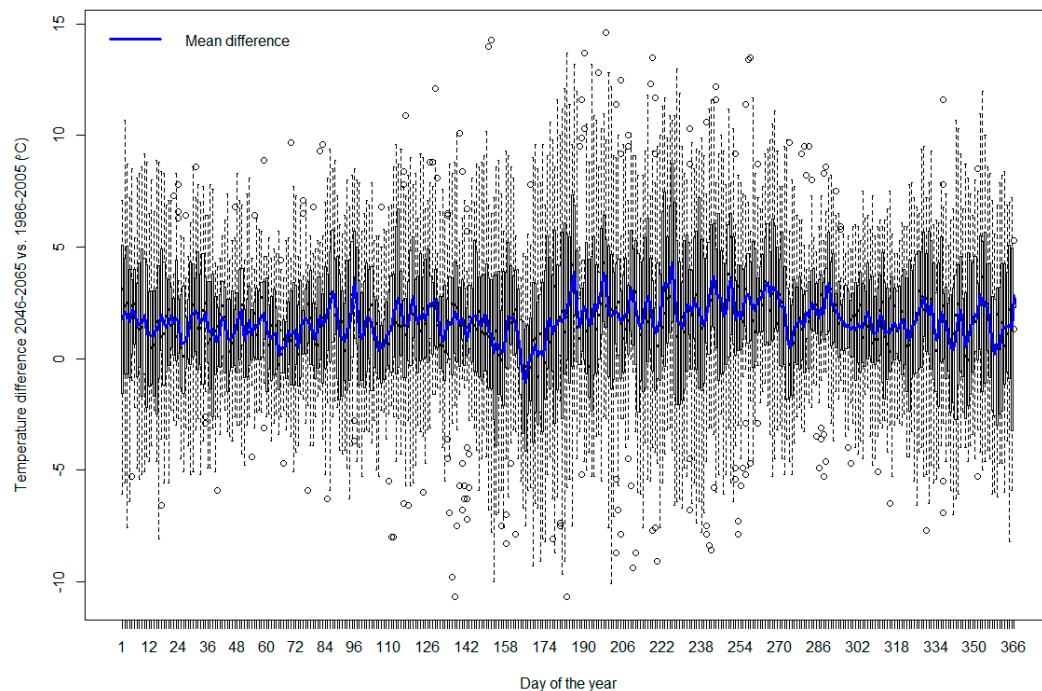

**Figure S1.** Distribution of daily changes in temperature between the historical period and the future period. The blue line represents median daily temperature differences (Future vs. Historical). (For interpretation of the colour references in this figure legend, the reader is referred to the Web version of this article).

**Table S1.** MMT (SE) and RR (95% CI) at 1st (6.9 °C) and 99th (27.7 °C) percentile temperature for different cause-specific mortality.

|           | MMT (SE)    | RR at 6.9          | RR at 27.7         |
|-----------|-------------|--------------------|--------------------|
| All-cause | 11.1 (5.63) | 1.10 (1.01 – 1.19) | 1.12 (0.99 – 1.28) |
| DM        | 11.2 (7.14) | 1.3 (0.99 – 1.71)  | 1.2 (0.80 – 1.79)  |
| CVD       | 22.8 (7.13) | 1.16 (0.97 – 1.39) | 1.08 (0.94 – 1.24) |
| HD        | 9.2 (9.34)  | 1.02 (0.92 – 1.12) | 1.21 (0.98 – 1.51) |
| RD        | 11.4 (7.12) | 1.33 (1.11 – 1.58) | 1.37 (1.03 – 1.82) |

Note: Minimum Mortality Temperature (MMT), Relative Risk (RR), Confidence Interval (CI).

**Table S2.** Number of heat-related and cold-related excess mortality based on different adaptation in the future.

| Cause of death | Adaptation scenarios      | Total                          | Extreme cold           | Moderate cold             | Moderate heat                  | Extreme heat                 |
|----------------|---------------------------|--------------------------------|------------------------|---------------------------|--------------------------------|------------------------------|
| All            | None                      | 11030 (730.04 to 20260.41)     | 22.3 (2.32 to 38.88)   | 206.81 (−73.42 to 453.67) | 1083 (548.23 to 20077.77)      | 9803 (61.46 to 17450.43)     |
| All            | Threshold 1 °C + High Pop | 11616.20 (−793.27 to 22098.15) | 4.03 (0.29 to 7.25)    | 68.27 (−30.38 to 160.06)  | 11547.93 (−913.35 to 21976.23) | 1445.02 (−65.32 to 2574.79)  |
| All            | Threshold 1 °C + Low Pop  | 11945.56 (−492.74 to 22494.34) | 4.03 (0.28 to 7.22)    | 66.79 (−31.41 to 158.18)  | 11878.78 (−561.13 to 22390.18) | 1468.98 (−43.50 to 2594.82)  |
| All            | Threshold 1 °C + Med Pop  | 11982.40 (−467.32 to 22540.40) | 4.03 (0.26 to 7.21)    | 66.38 (−31.80 to 157.70)  | 11916.02 (−533.48 to 22430.53) | 1470.72 (−44.78 to 2596.13)  |
| All            | Threshold 1 °C only       | 12430 (857.55 to 22738.60)     | 4.13 (0.35 to 7.33)    | 68.45 (−33.43 to 159.13)  | 1233 (806.55 to 22682.99)      | 1503 (92.69 to 2649.31)      |
| All            | Threshold 2 °C + High Pop | 13139.02 (−963.01 to 24991.11) | 3173 (28.33 to 553.08) | 19.54 (−11.91 to 48.47)   | 13119.48 (−997.21 to 24961.74) | 2060.02 (−58.01 to 3610.31)  |
| All            | Threshold 2 °C + Low Pop  | 15144.56 (−327.87 to 28169.46) | 3163 (27.89 to 551.11) | 4.81 (−3.31 to 12.27)     | 15139.75 (−334.72 to 28163.05) | 2863.20 (−34.59 to 4909.88)  |
| All            | Threshold 2 °C + Med Pop  | 13546.12 (−568.23 to 25401.30) | 3153 (27.40 to 550.04) | 18.90 (−12.46 to 47.68)   | 13527.23 (−587.72 to 25376.06) | 2094.82 (−32.58 to 3643.68)  |
| All            | Threshold 2 °C only       | 14030 (1371.51 to 25394.20)    | 3253 (35.25 to 559.52) | 19.48 (−12.45 to 48.15)   | 1403 (1378.86 to 25373.19)     | 2143 (172.98 to 3730.38)     |
| All            | Threshold 3 °C + High Pop | 14745.63 (−751.57 to 27765.40) | 3173 (28.33 to 553.08) | 4.94 (−3.20 to 12.43)     | 14740.69 (−758.50 to 27758.81) | 2820.40 (−65.27 to 4874.20)  |
| All            | Threshold 3 °C + Low Pop  | 15144.56 (−327.87 to 28169.46) | 3163 (27.89 to 551.11) | 4.81 (−3.31 to 12.27)     | 15139.75 (−334.72 to 28163.05) | 2863.20 (−34.59 to 4909.88)  |
| All            | Threshold 3 °C + Med Pop  | 15189.14 (−275.80 to 28212.30) | 3153 (27.40 to 550.04) | 4.78 (−3.35 to 12.23)     | 15184.36 (−285.22 to 28205.93) | 2865.73 (−38.67 to 4911.31)  |
| All            | Threshold 3 °C only       | 15730 (2058.09 to 28351.27)    | 3253 (35.25 to 559.52) | 4.92 (−3.27 to 12.30)     | 1573 (2050.79 to 28345.97)     | 2933 (187.30 to 5037.59)     |
| All            | Threshold 4 °C + High Pop | 16320.58 (−467.16 to 30256.64) | 3173 (28.33 to 553.08) | 1.03 (−1.08 to 2.97)      | 16319.54 (−468.65 to 30256.74) | 3872.43 (−122.24 to 6638.19) |

|     |                              |                                   |                              |                                   |                                  |                                  |
|-----|------------------------------|-----------------------------------|------------------------------|-----------------------------------|----------------------------------|----------------------------------|
| All | Threshold 4 °C +<br>Low Pop  | 16747.76 (−54.89 to<br>30739.14)  | 3163 (27.89 to<br>551.11)    | 1.00 (−1.11 to 2.93)              | 16746.77 (−55.59 to<br>30737.84) | 3929.82 (−56.31 to<br>6697.51)   |
| All | Threshold 4 °C +<br>Med Pop  | 16795.28 (−28.90 to<br>30785.75)  | 3153 (27.40 to<br>550.04)    | 0.99 (−1.11 to 2.92)              | 16794.29 (−29.59 to<br>30784.47) | 3933.03 (−52.62 to<br>6704.09)   |
| All | Threshold 4 °C<br>only       | 17430 (2204.06 to<br>31174.62)    | 3253 (35.25 to<br>559.52)    | 1.02 (−1.10 to 2.98)              | 1743 (2202.71 to<br>31173.58)    | 4023 (316.15 to<br>6862.91)      |
| CVD | None                         | 5635.68 (−2343.10 to<br>12634.15) | 11.51 (−3.63 to<br>23.03)    | 5085.61 (−2586.19 to<br>11977.40) | 550.07 (−479.99 to<br>1345.45)   | 364.10 (−274.73 to<br>836.50)    |
| CVD | Threshold 1 °C +<br>High Pop | 5566.30 (−1854.52 to<br>12278.52) | 2.59 (−0.49 to 4.98)         | 4818.33 (−2133.64 to<br>11038.34) | 747.98 (−740.72 to<br>1859.25)   | 535.58 (−470.00 to<br>1261.42)   |
| CVD | Threshold 1 °C +<br>Low Pop  | 5482.78 (−1970.94 to<br>12114.57) | 2.49 (−0.57 to 4.89)         | 4705.30 (−2274.06 to<br>10936.66) | 777.49 (−701.22 to<br>1885.42)   | 558.63 (−435.21 to<br>1280.38)   |
| CVD | Threshold 1 °C +<br>Med Pop  | 5415.08 (−2053.31 to<br>12032.62) | 2.45 (−0.62 to 4.86)         | 4638.70 (−2344.40 to<br>10869.62) | 776.38 (−702.24 to<br>1885.33)   | 557.04 (−438.54 to<br>1279.52)   |
| CVD | Threshold 1 °C<br>only       | 5247.69 (−2212.63 to<br>11838.08) | 2.44 (−0.63 to 4.84)         | 4460.59 (−2565.66 to<br>10683.51) | 787.10 (−686.84 to<br>1890.75)   | 566.89 (−421.18 to<br>1285.95)   |
| CVD | Threshold 2 °C +<br>High Pop | 5087.96 (−2150.05 to<br>11676.16) | 162.56 (−55.48 to<br>329.01) | 3997.30 (−2208.22 to<br>9516.15)  | 1090.66 (−983.75 to<br>2612.24)  | 803.80 (−634.33 to<br>1819.79)   |
| CVD | Threshold 2 °C +<br>Low Pop  | 5146.84 (−2088.45 to<br>11727.75) | 165.72 (−51.54 to<br>331.96) | 4054.49 (−2148.38 to<br>9570.35)  | 1092.35 (−979.22 to<br>2612.41)  | 806.19 (−636.55 to<br>1821.05)   |
| CVD | Threshold 2 °C +<br>Med Pop  | 5087.96 (−2150.05 to<br>11676.16) | 162.56 (−55.48 to<br>329.01) | 3997.30 (−2208.22 to<br>9516.15)  | 1090.66 (−983.75 to<br>2612.24)  | 803.80 (−634.33 to<br>1819.79)   |
| CVD | Threshold 2 °C<br>only       | 4976.52 (−2262.80 to<br>11578.59) | 163.53 (−53.24 to<br>329.69) | 3870.49 (−2336.33 to<br>9395.95)  | 1106.03 (−954.29 to<br>2619.94)  | 818.19 (−618.67 to<br>1828.97)   |
| CVD | Threshold 3 °C +<br>High Pop | 4830.53 (−2301.87 to<br>10963.60) | 162.56 (−55.48 to<br>329.01) | 2774.49 (−2160.28 to<br>7124.39)  | 2056.03 (−1780.11 to<br>4787.39) | 1535.36 (−1238.92 to<br>3401.87) |
| CVD | Threshold 3 °C +<br>Low Pop  | 4940.05 (−2082.70 to<br>11265.98) | 165.72 (−51.54 to<br>331.96) | 3426.99 (−2239.87 to<br>8444.70)  | 1513.06 (−1321.91 to<br>3571.60) | 1116.71 (−891.17 to<br>2489.20)  |
| CVD | Threshold 3 °C +<br>Med Pop  | 4888.89 (−2128.34 to<br>11228.35) | 162.56 (−55.48 to<br>329.01) | 3378.38 (−2293.45 to<br>8414.07)  | 1510.51 (−1327.06 to<br>3571.27) | 1113.29 (−889.94 to<br>2487.27)  |
| CVD | Threshold 3 °C<br>only       | 4825.07 (−2234.82 to<br>10946.03) | 163.53 (−53.24 to<br>329.69) | 2738.37 (−2194.19 to<br>7081.28)  | 2086.69 (−1737.32 to<br>4809.19) | 1563.18 (−1194.64 to<br>3420.41) |

|     |                           |                                |                           |                               |                               |                               |
|-----|---------------------------|--------------------------------|---------------------------|-------------------------------|-------------------------------|-------------------------------|
| CVD | Threshold 4 °C + High Pop | 4774.42 (−2379.05 to 10912.23) | 171.47 (−44.75 to 338.65) | 2793.94 (−2157.22 to 7136.44) | 1980.49 (−1918.80 to 4719.35) | 1476.80 (−1341.65 to 3346.60) |
| CVD | Threshold 4 °C + Low Pop  | 4874.96 (−2248.21 to 10998.64) | 165.72 (−51.54 to 331.96) | 2815.05 (−2119.27 to 7160.71) | 2059.91 (−1781.38 to 4787.24) | 1540.13 (−1230.08 to 3404.50) |
| CVD | Threshold 4 °C + Med Pop  | 4830.53 (−2301.87 to 10963.60) | 162.56 (−55.48 to 329.01) | 2774.49 (−2160.28 to 7124.39) | 2056.03 (−1780.11 to 4787.39) | 1535.36 (−1238.92 to 3401.87) |
| CVD | Threshold 4 °C only       | 4825.07 (−2234.82 to 10946.03) | 163.53 (−53.24 to 329.69) | 2738.37 (−2194.19 to 7081.28) | 2086.69 (−1737.32 to 4809.19) | 1563.18 (−1194.64 to 3420.41) |
| DM  | None                      | 1621.55 (−921.43 to 3648.63)   | 4.32 (−0.35 to 7.37)      | 43.30 (−26.76 to 103.24)      | 1578.25 (−963.41 to 3645.12)  | 149.53 (−80.35 to 286.57)     |
| DM  | Threshold 1 °C + High Pop | 2015.02 (−812.29 to 4350.81)   | 1.03 (0.10 to 1.72)       | 15.38 (−8.32 to 37.82)        | 1999.63 (−835.11 to 4335.85)  | 248.05 (−68.34 to 442.09)     |
| DM  | Threshold 1 °C + Low Pop  | 1886.79 (−955.25 to 4187.96)   | 0.96 (−0.05 to 1.66)      | 14.87 (−8.65 to 35.33)        | 1871.92 (−981.02 to 4209.82)  | 236.87 (−100.48 to 435.44)    |
| DM  | Threshold 1 °C + Med Pop  | 1855.86 (−984.57 to 4144.57)   | 0.96 (−0.05 to 1.66)      | 15.00 (−10.57 to 37.55)       | 1840.85 (−987.34 to 4129.73)  | 234.80 (−105.04 to 433.65)    |
| DM  | Threshold 1 °C only       | 1779.81 (−1092.57 to 4098.20)  | 0.93 (−0.08 to 1.65)      | 14.56 (−11.10 to 37.19)       | 1765.25 (−1105.22 to 4083.93) | 230.67 (−112.08 to 430.74)    |
| DM  | Threshold 2 °C + High Pop | 2230.78 (−925.97 to 4835.16)   | 63.3 (7.19 to 105.24)     | 4.47 (−3.16 to 11.81)         | 2226.31 (−927.80 to 4831.18)  | 353.70 (−65.23 to 610.56)     |
| DM  | Threshold 2 °C + Low Pop  | 2091.57 (−1089.93 to 4701.24)  | 61.32 (−1.82 to 101.63)   | 4.33 (−3.22 to 11.09)         | 2087.23 (−1096.95 to 4696.96) | 338.19 (−114.73 to 602.78)    |
| DM  | Threshold 2 °C + Med Pop  | 2057.54 (−1125.30 to 4646.82)  | 61.33 (−2.31 to 101.88)   | 4.38 (−3.73 to 11.74)         | 2053.16 (−1126.36 to 4647.49) | 335.43 (−120.05 to 600.22)    |
| DM  | Threshold 2 °C only       | 1972.99 (−1268.47 to 4584.27)  | 59.97 (−4.55 to 101.20)   | 4.25 (−3.87 to 11.67)         | 1968.75 (−1269.44 to 4576.93) | 330.06 (−131.64 to 596.64)    |
| DM  | Threshold 3 °C + High Pop | 2454.30 (−1084.77 to 5309.88)  | 63.3 (7.19 to 105.24)     | 1.17 (−0.84 to 3.11)          | 2453.14 (−1086.72 to 5307.81) | 482.70 (−79.03 to 806.09)     |
| DM  | Threshold 3 °C + Low Pop  | 2305.12 (−1275.19 to 5201.34)  | 61.32 (−1.82 to 101.63)   | 1.13 (−0.85 to 2.91)          | 2303.99 (−1277.71 to 5200.29) | 462.14 (−127.89 to 801.16)    |
| DM  | Threshold 3 °C + Med Pop  | 2268.46 (−1278.22 to 5161.36)  | 61.33 (−2.31 to 101.88)   | 1.14 (−1.00 to 3.09)          | 2267.32 (−1280.92 to 5160.38) | 458.60 (−131.27 to 797.84)    |

|    |                           |                               |                           |                        |                               |                             |
|----|---------------------------|-------------------------------|---------------------------|------------------------|-------------------------------|-----------------------------|
| DM | Threshold 3 °C only       | 2175.90 (−1380.74 to 5100.17) | 59.97 (−4.55 to 101.20)   | 1.11 (−1.04 to 3.07)   | 2174.79 (−1383.41 to 5099.27) | 451.92 (−144.01 to 794.71)  |
| DM | Threshold 4 °C + High Pop | 2661.64 (−1111.43 to 5723.52) | 63.3 (7.19 to 105.24)     | 0.26 (−0.29 to 0.79)   | 2661.38 (−1112.03 to 5723.34) | 658.95 (−90.32 to 1084.56)  |
| DM | Threshold 4 °C + Low Pop  | 2504.64 (−1364.22 to 5606.83) | 61.32 (−1.82 to 101.63)   | 0.25 (−0.27 to 0.75)   | 2504.39 (−1364.36 to 5606.64) | 631.47 (−164.27 to 1078.17) |
| DM | Threshold 4 °C + Med Pop  | 2465.89 (−1394.66 to 5563.89) | 61.33 (−2.31 to 101.88)   | 0.26 (−0.32 to 0.80)   | 2465.63 (−1395.23 to 5564.08) | 626.79 (−170.39 to 1073.84) |
| DM | Threshold 4 °C only       | 2366.44 (−1532.72 to 5478.78) | 59.97 (−4.55 to 101.20)   | 0.25 (−0.33 to 0.79)   | 2366.20 (−1533.29 to 5478.98) | 618.00 (−186.92 to 1069.75) |
| HD | None                      | 7533 (1491.42 to 12390.08)    | 1.72 (−6.66 to 8.63)      | 4.20 (−27.51 to 31.69) | 7523 (1478.86 to 12388.26)    | 354.63 (−147.93 to 690.06)  |
| HD | Threshold 1 °C + High Pop | 8683 (1823.10 to 14251.99)    | 0.13 (−1.04 to 1.13)      | 0.35 (−4.30 to 4.49)   | 8683 (1822.90 to 14250.82)    | 527.86 (−251.06 to 1032.58) |
| HD | Threshold 1 °C + Low Pop  | 8253 (1520.26 to 13672.28)    | 0.20 (−1.14 to 1.34)      | 0.72 (−6.65 to 7.15)   | 8253 (1512.88 to 13677.65)    | 514.15 (−263.20 to 1020.78) |
| HD | Threshold 1 °C + Med Pop  | 8253 (1518.91 to 13672.86)    | 0.22 (−1.13 to 1.35)      | 0.80 (−6.57 to 7.22)   | 8253 (1508.17 to 13677.64)    | 516.57 (−261.02 to 1022.94) |
| HD | Threshold 1 °C only       | 8363 (1783.13 to 13807.44)    | 0.26 (−1.12 to 1.43)      | 1.06 (−7.03 to 8.11)   | 8363 (1775.30 to 13809.12)    | 531.79 (−235.25 to 1033.39) |
| HD | Threshold 2 °C + High Pop | 9473 (1992.50 to 15521.49)    | 13.88 (−95.21 to 104.90)  | 0.05 (−1.01 to 1.01)   | 9473 (1992.42 to 15521.77)    | 724.13 (−385.48 to 1429.66) |
| HD | Threshold 2 °C + Low Pop  | 9023 (1830.56 to 14908.79)    | 20.58 (−100.86 to 119.39) | 0.14 (−1.71 to 1.79)   | 9023 (1829.94 to 14907.91)    | 707.83 (−403.72 to 1409.01) |
| HD | Threshold 2 °C + Med Pop  | 9023 (1828.52 to 14912.43)    | 21.88 (−99.25 to 120.39)  | 0.16 (−1.68 to 1.80)   | 9023 (1827.88 to 14911.54)    | 711.63 (−398.72 to 1411.73) |
| HD | Threshold 2 °C only       | 9153 (2048.69 to 15057.29)    | 26.02 (−97.71 to 126.13)  | 0.23 (−1.85 to 2.06)   | 9153 (2048.58 to 15058.44)    | 733.85 (−363.79 to 1428.61) |
| HD | Threshold 3 °C + High Pop | 1013 (2092.27 to 16727.80)    | 13.88 (−95.21 to 104.90)  | 0.03 (0.00 to 0.00)    | 1013 (2092.27 to 16727.80)    | 956.03 (−581.32 to 1903.76) |
| HD | Threshold 3 °C + Low Pop  | 9713 (1918.78 to 16132.28)    | 20.58 (−100.86 to 119.39) | 0.01 (−0.17 to 0.17)   | 9713 (1918.87 to 16132.33)    | 937.81 (−595.86 to 1886.56) |

|    |                              |                               |                              |                           |                               |                                 |
|----|------------------------------|-------------------------------|------------------------------|---------------------------|-------------------------------|---------------------------------|
| HD | Threshold 3 °C +<br>Med Pop  | 9713 (1918.32 to<br>16137.98) | 21.88 (−99.25 to<br>120.39)  | 0.01 (−0.17 to 0.17)      | 9713 (1918.41 to<br>16138.03) | 943.46 (−585.92 to<br>1890.83)  |
| HD | Threshold 3 °C<br>only       | 9873 (2040.78 to<br>16239.09) | 26.02 (−97.71 to<br>126.13)  | 0.01 (−0.25 to 0.26)      | 9873 (2040.86 to<br>16239.05) | 974.57 (−564.11 to<br>1911.51)  |
| HD | Threshold 4 °C +<br>High Pop | 1073 (2244.59 to<br>17628.85) | 13.88 (−95.21 to<br>104.90)  | 20.07 (−175.60 to 187.94) | 1073 (2244.59 to<br>17628.85) | 1290.42 (−866.18 to<br>2586.47) |
| HD | Threshold 4 °C +<br>Low Pop  | 1023 (1740.00 to<br>17064.49) | 20.58 (−100.86 to<br>119.39) | 33.41 (−217.33 to 246.61) | 1023 (1740.00 to<br>17064.49) | 1268.29 (−910.97 to<br>2564.92) |
| HD | Threshold 4 °C +<br>Med Pop  | 1033 (1736.43 to<br>17066.71) | 21.88 (−99.25 to<br>120.39)  | 36.11 (−214.50 to 249.19) | 1033 (1736.43 to<br>17066.71) | 1276.38 (−895.87 to<br>2570.85) |
| HD | Threshold 4 °C<br>only       | 1043 (1909.63 to<br>17137.39) | 26.02 (−97.71 to<br>126.13)  | 44.80 (−221.13 to 269.05) | 1043 (1909.63 to<br>17137.39) | 1319.64 (−854.57 to<br>2598.93) |
| RD | None                         | 5163 (1646.91 to<br>7933.96)  | 12.3 (5.03 to 17.56)         | 1453 (11.35 to 264.36)    | 5013 (1499.08 to<br>7786.50)  | 303.08 (−42.10 to<br>504.69)    |
| RD | Threshold 1 °C +<br>High Pop | 5823 (1797.24 to<br>8957.72)  | 2.33 (1.03 to 3.45)          | 53.3 (2.11 to 99.74)      | 5773 (1747.40 to<br>8899.93)  | 458.96 (−62.20 to<br>758.32)    |
| RD | Threshold 1 °C +<br>Low Pop  | 5893 (1865.87 to<br>9026.89)  | 2.33 (0.96 to 3.40)          | 51.06 (−0.25 to 97.11)    | 5843 (1813.14 to<br>8985.95)  | 459.25 (−62.28 to<br>760.09)    |
| RD | Threshold 1 °C +<br>Med Pop  | 5873 (1843.64 to<br>9017.54)  | 2.33 (0.95 to 3.39)          | 50.90 (−0.45 to 96.93)    | 5823 (1791.05 to<br>8977.10)  | 457.60 (−64.50 to<br>759.15)    |
| RD | Threshold 1 °C<br>only       | 5833 (1770.92 to<br>8988.99)  | 2.33 (0.93 to 3.38)          | 50.76 (−0.61 to 96.76)    | 5783 (1718.17 to<br>8958.23)  | 453.52 (−75.83 to<br>756.03)    |
| RD | Threshold 2 °C +<br>High Pop | 6593 (1992.92 to<br>10129.69) | 1783 (79.95 to<br>251.71)    | 16.37 (−0.92 to 31.99)    | 6583 (1968.40 to<br>10121.05) | 630.95 (−110.63 to<br>1051.79)  |
| RD | Threshold 2 °C +<br>Low Pop  | 6673 (2067.27 to<br>10214.80) | 1743 (74.57 to<br>247.87)    | 15.52 (−1.78 to 31.03)    | 6653 (2041.65 to<br>10200.21) | 630.23 (−117.79 to<br>1051.57)  |
| RD | Threshold 2 °C +<br>Med Pop  | 6653 (2047.12 to<br>10200.55) | 1733 (73.94 to<br>247.35)    | 15.47 (−1.83 to 30.97)    | 6643 (2021.52 to<br>10192.34) | 627.80 (−121.83 to<br>1049.85)  |
| RD | Threshold 2 °C<br>only       | 6603 (1988.55 to<br>10164.69) | 1723 (72.11 to<br>246.80)    | 15.44 (−1.83 to 30.92)    | 6593 (1962.87 to<br>10157.09) | 621.96 (−133.00 to<br>1047.79)  |
| RD | Threshold 3 °C +<br>High Pop | 7383 (2246.41 to<br>11279.73) | 1783 (79.95 to<br>251.71)    | 4.28 (−0.53 to 8.52)      | 7383 (2241.03 to<br>11277.64) | 832.16 (−180.44 to<br>1381.41)  |

|    |                              |                               |                           |                      |                               |                                 |
|----|------------------------------|-------------------------------|---------------------------|----------------------|-------------------------------|---------------------------------|
| RD | Threshold 3 °C +<br>Low Pop  | 7463 (2355.12 to<br>11351.77) | 1743 (74.57 to<br>247.87) | 4.05 (−0.75 to 8.29) | 7463 (2349.97 to<br>11346.82) | 829.75 (−185.24 to<br>1383.30)  |
| RD | Threshold 3 °C +<br>Med Pop  | 7453 (2332.33 to<br>11339.95) | 1733 (73.94 to<br>247.35) | 4.04 (−0.75 to 8.28) | 7443 (2327.18 to<br>11335.01) | 826.36 (−190.27 to<br>1381.82)  |
| RD | Threshold 3 °C<br>only       | 7393 (2258.72 to<br>11314.58) | 1723 (72.11 to<br>246.80) | 4.04 (−0.79 to 8.29) | 7393 (2253.56 to<br>11309.67) | 818.33 (−212.68 to<br>1374.97)  |
| RD | Threshold 4 °C +<br>High Pop | 8123 (2541.87 to<br>12318.68) | 1783 (79.95 to<br>251.71) | 0.99 (−0.24 to 2.12) | 8123 (2540.55 to<br>12317.67) | 1121.41 (−284.49 to<br>1861.17) |
| RD | Threshold 4 °C +<br>Low Pop  | 8203 (2624.87 to<br>12396.57) | 1743 (74.57 to<br>247.87) | 0.93 (−0.29 to 2.06) | 8203 (2624.09 to<br>12395.63) | 1117.21 (−307.09 to<br>1861.02) |
| RD | Threshold 4 °C +<br>Med Pop  | 8193 (2591.83 to<br>12380.04) | 1733 (73.94 to<br>247.35) | 0.93 (−0.29 to 2.05) | 8183 (2591.06 to<br>12379.11) | 1112.51 (−317.65 to<br>1858.49) |
| RD | Threshold 4 °C<br>only       | 8133 (2478.52 to<br>12340.46) | 1723 (72.11 to<br>246.80) | 0.93 (−0.29 to 2.06) | 8133 (2477.74 to<br>12339.78) | 1101.50 (−337.92 to<br>1851.63) |

---



**Table S3.** Net difference (Future – Historical) in temperature-related excess mortality by different scenarios (future vs historical)

| Cause-specific | Exposure      | Adaptation          | Relative AF% (95% CI)  |
|----------------|---------------|---------------------|------------------------|
| All            | Total         | None                | 0.53 (–0.5 to 1.51)    |
| All            | Extreme cold  | None                | –0.14 (–0.25 to –0.02) |
| All            | Moderate cold | None                | –0.39 (–0.74 to 0.01)  |
| All            | Moderate heat | None                | 0.92 (–0.09 to 1.84)   |
| All            | Extreme heat  | None                | 0.33 (0.02 to 0.59)    |
| DM             | Total         | None                | 0.27 (–3.15 to 3.13)   |
| DM             | Extreme cold  | None                | –0.34 (–0.57 to 0.03)  |
| DM             | Moderate cold | None                | –0.98 (–1.94 to 0.22)  |
| DM             | Moderate heat | None                | 1.25 (–2.22 to 3.86)   |
| DM             | Extreme heat  | None                | 0.66 (–0.35 to 1.26)   |
| CVD            | Total         | None                | –0.83 (–2.22 to 0.67)  |
| CVD            | Extreme cold  | None                | –0.17 (–0.33 to 0.05)  |
| CVD            | Moderate cold | None                | –1.23 (–2.51 to 0.29)  |
| CVD            | Moderate heat | None                | 0.39 (–0.33 to 0.93)   |
| CVD            | Extreme heat  | None                | 0.29 (–0.21 to 0.66)   |
| HD             | Total         | None                | 1.79 (0.04 to 3.18)    |
| HD             | Extreme cold  | None                | –0.04 (–0.18 to 0.14)  |
| HD             | Moderate cold | None                | –0.06 (–0.37 to 0.3)   |
| HD             | Moderate heat | None                | 1.86 (0.12 to 3.2)     |
| HD             | Extreme heat  | None                | 0.39 (–0.16 to 0.76)   |
| RD             | Total         | None                | 1.46 (–0.66 to 3.13)   |
| RD             | Extreme cold  | None                | –0.43 (–0.61 to –0.18) |
| RD             | Moderate cold | None                | –1.28 (–2 to –0.44)    |
| RD             | Moderate heat | None                | 2.74 (0.71 to 4.25)    |
| RD             | Extreme heat  | None                | 0.58 (–0.08 to 0.96)   |
| All            | Total         | Threshold 1 °C only | 1.19 (–0.47 to 2.72)   |
| All            | Extreme cold  | Threshold 1 °C only | –0.15 (–0.26 to –0.02) |
| All            | Moderate cold | Threshold 1 °C only | –0.46 (–0.88 to 0.03)  |
| All            | Moderate heat | Threshold 1 °C only | 1.65 (–0.03 to 3.16)   |
| All            | Extreme heat  | Threshold 1 °C only | 0.59 (0.04 to 1.03)    |
| DM             | Total         | Threshold 1 °C only | 1.24 (–4.37 to 5.75)   |
| DM             | Extreme cold  | Threshold 1 °C only | –0.36 (–0.61 to 0.03)  |
| DM             | Moderate cold | Threshold 1 °C only | –1.15 (–2.35 to 0.32)  |
| DM             | Moderate heat | Threshold 1 °C only | 2.39 (–3.35 to 6.76)   |
| DM             | Extreme heat  | Threshold 1 °C only | 1.15 (–0.54 to 2.14)   |
| CVD            | Total         | Threshold 1 °C only | –1.26 (–3.58 to 1.16)  |
| CVD            | Extreme cold  | Threshold 1 °C only | –0.18 (–0.35 to 0.06)  |
| CVD            | Moderate cold | Threshold 1 °C only | –1.91 (–4.02 to 0.49)  |
| CVD            | Moderate heat | Threshold 1 °C only | 0.65 (–0.54 to 1.53)   |
| CVD            | Extreme heat  | Threshold 1 °C only | 0.51 (–0.38 to 1.15)   |
| HD             | Total         | Threshold 1 °C only | 3.09 (0.22 to 5.29)    |
| HD             | Extreme cold  | Threshold 1 °C only | –0.04 (–0.19 to 0.15)  |
| HD             | Moderate cold | Threshold 1 °C only | –0.07 (–0.4 to 0.33)   |

|     |               |                           |                        |
|-----|---------------|---------------------------|------------------------|
| HD  | Moderate heat | Threshold 1 °C only       | 3.16 (0.27 to 5.4)     |
| HD  | Extreme heat  | Threshold 1 °C only       | 0.66 (−0.31 to 1.29)   |
| RD  | Total         | Threshold 1 °C only       | 3.27 (−0.31 to 6.02)   |
| RD  | Extreme cold  | Threshold 1 °C only       | −0.46 (−0.65 to −0.19) |
| RD  | Moderate cold | Threshold 1 °C only       | −1.53 (−2.44 to −0.47) |
| RD  | Moderate heat | Threshold 1 °C only       | 4.79 (1.34 to 7.33)    |
| RD  | Extreme heat  | Threshold 1 °C only       | 0.98 (−0.17 to 1.64)   |
| All | Total         | Threshold 1 °C + High Pop | 1.09 (−0.75 to 2.66)   |
| All | Extreme cold  | Threshold 1 °C + High Pop | −0.15 (−0.26 to −0.01) |
| All | Moderate cold | Threshold 1 °C + High Pop | −0.45 (−0.88 to 0.02)  |
| All | Moderate heat | Threshold 1 °C + High Pop | 1.54 (−0.27 to 3.04)   |
| All | Extreme heat  | Threshold 1 °C + High Pop | 0.56 (−0.02 to 1)      |
| DM  | Total         | Threshold 1 °C + High Pop | 1.5 (−4.19 to 5.69)    |
| DM  | Extreme cold  | Threshold 1 °C + High Pop | −0.38 (−0.63 to −0.04) |
| DM  | Moderate cold | Threshold 1 °C + High Pop | −1.23 (−2.42 to 0.18)  |
| DM  | Moderate heat | Threshold 1 °C + High Pop | 2.73 (−2.72 to 6.84)   |
| DM  | Extreme heat  | Threshold 1 °C + High Pop | 1.24 (−0.31 to 2.19)   |
| CVD | Total         | Threshold 1 °C + High Pop | −1.57 (−3.85 to 0.81)  |
| CVD | Extreme cold  | Threshold 1 °C + High Pop | −0.18 (−0.36 to 0.05)  |
| CVD | Moderate cold | Threshold 1 °C + High Pop | −2.19 (−4.26 to 0.18)  |
| CVD | Moderate heat | Threshold 1 °C + High Pop | 0.62 (−0.59 to 1.5)    |
| CVD | Extreme heat  | Threshold 1 °C + High Pop | 0.48 (−0.43 to 1.12)   |
| HD  | Total         | Threshold 1 °C + High Pop | 3.19 (0.34 to 5.38)    |
| HD  | Extreme cold  | Threshold 1 °C + High Pop | −0.02 (−0.16 to 0.15)  |
| HD  | Moderate cold | Threshold 1 °C + High Pop | −0.03 (−0.28 to 0.27)  |
| HD  | Moderate heat | Threshold 1 °C + High Pop | 3.22 (0.35 to 5.44)    |
| HD  | Extreme heat  | Threshold 1 °C + High Pop | 0.66 (−0.32 to 1.3)    |
| RD  | Total         | Threshold 1 °C + High Pop | 3.17 (−0.4 to 5.94)    |
| RD  | Extreme cold  | Threshold 1 °C + High Pop | −0.47 (−0.66 to −0.21) |
| RD  | Moderate cold | Threshold 1 °C + High Pop | −1.6 (−2.5 to −0.55)   |
| RD  | Moderate heat | Threshold 1 °C + High Pop | 4.77 (1.37 to 7.3)     |
| RD  | Extreme heat  | Threshold 1 °C + High Pop | 0.99 (−0.14 to 1.65)   |
| All | Total         | Threshold 1 °C + Med Pop  | 1.15 (−0.69 to 2.7)    |
| All | Extreme cold  | Threshold 1 °C + Med Pop  | −0.15 (−0.26 to −0.01) |
| All | Moderate cold | Threshold 1 °C + Med Pop  | −0.44 (−0.87 to 0.02)  |
| All | Moderate heat | Threshold 1 °C + Med Pop  | 1.59 (−0.21 to 3.1)    |
| All | Extreme heat  | Threshold 1 °C + Med Pop  | 0.57 (−0.02 to 1.01)   |
| DM  | Total         | Threshold 1 °C + Med Pop  | 1.34 (−4.23 to 5.85)   |
| DM  | Extreme cold  | Threshold 1 °C + Med Pop  | −0.37 (−0.61 to 0.01)  |
| DM  | Moderate cold | Threshold 1 °C + Med Pop  | −1.18 (−2.38 to 0.28)  |
| DM  | Moderate heat | Threshold 1 °C + Med Pop  | 2.52 (−3.1 to 6.86)    |
| DM  | Extreme heat  | Threshold 1 °C + Med Pop  | 1.17 (−0.51 to 2.15)   |
| CVD | Total         | Threshold 1 °C + Med Pop  | −1.37 (−3.68 to 1.03)  |
| CVD | Extreme cold  | Threshold 1 °C + Med Pop  | −0.17 (−0.35 to 0.06)  |
| CVD | Moderate cold | Threshold 1 °C + Med Pop  | −2.01 (−4.11 to 0.38)  |
| CVD | Moderate heat | Threshold 1 °C + Med Pop  | 0.64 (−0.55 to 1.52)   |
| CVD | Extreme heat  | Threshold 1 °C + Med Pop  | 0.5 (−0.39 to 1.14)    |

|     |               |                          |                        |
|-----|---------------|--------------------------|------------------------|
| HD  | Total         | Threshold 1 °C + Med Pop | 3.04 (0.17 to 5.25)    |
| HD  | Extreme cold  | Threshold 1 °C + Med Pop | -0.03 (-0.18 to 0.15)  |
| HD  | Moderate cold | Threshold 1 °C + Med Pop | -0.05 (-0.37 to 0.32)  |
| HD  | Moderate heat | Threshold 1 °C + Med Pop | 3.1 (0.2 to 5.35)      |
| HD  | Extreme heat  | Threshold 1 °C + Med Pop | 0.64 (-0.33 to 1.27)   |
| RD  | Total         | Threshold 1 °C + Med Pop | 3.29 (-0.28 to 6.04)   |
| RD  | Extreme cold  | Threshold 1 °C + Med Pop | -0.46 (-0.65 to -0.2)  |
| RD  | Moderate cold | Threshold 1 °C + Med Pop | -1.54 (-2.44 to -0.49) |
| RD  | Moderate heat | Threshold 1 °C + Med Pop | 4.82 (1.41 to 7.35)    |
| RD  | Extreme heat  | Threshold 1 °C + Med Pop | 0.99 (-0.15 to 1.65)   |
| All | Total         | Threshold 1 °C + Low Pop | 1.14 (-0.7 to 2.7)     |
| All | Extreme cold  | Threshold 1 °C + Low Pop | -0.15 (-0.26 to -0.01) |
| All | Moderate cold | Threshold 1 °C + Low Pop | -0.44 (-0.87 to 0.02)  |
| All | Moderate heat | Threshold 1 °C + Low Pop | 1.58 (-0.22 to 3.09)   |
| All | Extreme heat  | Threshold 1 °C + Low Pop | 0.57 (-0.01 to 1.01)   |
| DM  | Total         | Threshold 1 °C + Low Pop | 1.39 (-4.17 to 5.88)   |
| DM  | Extreme cold  | Threshold 1 °C + Low Pop | -0.37 (-0.61 to 0.01)  |
| DM  | Moderate cold | Threshold 1 °C + Low Pop | -1.18 (-2.34 to 0.25)  |
| DM  | Moderate heat | Threshold 1 °C + Low Pop | 2.57 (-3 to 6.88)      |
| DM  | Extreme heat  | Threshold 1 °C + Low Pop | 1.18 (-0.48 to 2.16)   |
| CVD | Total         | Threshold 1 °C + Low Pop | -1.4 (-3.71 to 0.99)   |
| CVD | Extreme cold  | Threshold 1 °C + Low Pop | -0.18 (-0.36 to 0.06)  |
| CVD | Moderate cold | Threshold 1 °C + Low Pop | -2.05 (-4.14 to 0.34)  |
| CVD | Moderate heat | Threshold 1 °C + Low Pop | 0.64 (-0.55 to 1.52)   |
| CVD | Extreme heat  | Threshold 1 °C + Low Pop | 0.5 (-0.39 to 1.14)    |
| HD  | Total         | Threshold 1 °C + Low Pop | 3.05 (0.17 to 5.25)    |
| HD  | Extreme cold  | Threshold 1 °C + Low Pop | -0.03 (-0.18 to 0.15)  |
| HD  | Moderate cold | Threshold 1 °C + Low Pop | -0.05 (-0.37 to 0.33)  |
| HD  | Moderate heat | Threshold 1 °C + Low Pop | 3.1 (0.2 to 5.34)      |
| HD  | Extreme heat  | Threshold 1 °C + Low Pop | 0.64 (-0.33 to 1.27)   |
| RD  | Total         | Threshold 1 °C + Low Pop | 3.29 (-0.27 to 6.04)   |
| RD  | Extreme cold  | Threshold 1 °C + Low Pop | -0.46 (-0.65 to -0.2)  |
| RD  | Moderate cold | Threshold 1 °C + Low Pop | -1.54 (-2.45 to -0.49) |
| RD  | Moderate heat | Threshold 1 °C + Low Pop | 4.83 (1.42 to 7.35)    |
| RD  | Extreme heat  | Threshold 1 °C + Low Pop | 0.99 (-0.14 to 1.65)   |
| All | Total         | Threshold 2 °C only      | 1.96 (-0.39 to 4.08)   |
| All | Extreme cold  | Threshold 2 °C only      | 0 (0 to 0)             |
| All | Moderate cold | Threshold 2 °C only      | -0.48 (-0.93 to 0.04)  |
| All | Moderate heat | Threshold 2 °C only      | 2.44 (0.03 to 4.57)    |
| All | Extreme heat  | Threshold 2 °C only      | 0.89 (0.08 to 1.55)    |
| DM  | Total         | Threshold 2 °C only      | 2.41 (-5.17 to 8.59)   |
| DM  | Extreme cold  | Threshold 2 °C only      | 0 (0 to 0)             |
| DM  | Moderate cold | Threshold 2 °C only      | -1.22 (-2.51 to 0.36)  |
| DM  | Moderate heat | Threshold 2 °C only      | 3.63 (-4.6 to 9.64)    |
| DM  | Extreme heat  | Threshold 2 °C only      | 1.76 (-0.66 to 3.15)   |
| CVD | Total         | Threshold 2 °C only      | -1.55 (-4.91 to 1.74)  |
| CVD | Extreme cold  | Threshold 2 °C only      | 0 (0 to 0)             |

|     |               |                           |                        |
|-----|---------------|---------------------------|------------------------|
| CVD | Moderate cold | Threshold 2 °C only       | -2.55 (-5.52 to 0.75)  |
| CVD | Moderate heat | Threshold 2 °C only       | 1 (-0.83 to 2.32)      |
| CVD | Extreme heat  | Threshold 2 °C only       | 0.78 (-0.59 to 1.74)   |
| HD  | Total         | Threshold 2 °C only       | 4.32 (0.24 to 7.38)    |
| HD  | Extreme cold  | Threshold 2 °C only       | 0 (0 to 0)             |
| HD  | Moderate cold | Threshold 2 °C only       | -0.07 (-0.41 to 0.34)  |
| HD  | Moderate heat | Threshold 2 °C only       | 4.38 (0.28 to 7.49)    |
| HD  | Extreme heat  | Threshold 2 °C only       | 0.98 (-0.51 to 1.9)    |
| RD  | Total         | Threshold 2 °C only       | 5.34 (0.29 to 9.11)    |
| RD  | Extreme cold  | Threshold 2 °C only       | 0 (0 to 0)             |
| RD  | Moderate cold | Threshold 2 °C only       | -1.62 (-2.61 to -0.47) |
| RD  | Moderate heat | Threshold 2 °C only       | 6.96 (2.01 to 10.56)   |
| RD  | Extreme heat  | Threshold 2 °C only       | 1.43 (-0.33 to 2.41)   |
| All | Total         | Threshold 2 °C + High Pop | 1.82 (-0.72 to 3.95)   |
| All | Extreme cold  | Threshold 2 °C + High Pop | 0 (0 to 0)             |
| All | Moderate cold | Threshold 2 °C + High Pop | -0.47 (-0.93 to 0.03)  |
| All | Moderate heat | Threshold 2 °C + High Pop | 2.29 (-0.27 to 4.39)   |
| All | Extreme heat  | Threshold 2 °C + High Pop | 0.85 (-0.02 to 1.49)   |
| DM  | Total         | Threshold 2 °C + High Pop | 2.81 (-5.04 to 8.49)   |
| DM  | Extreme cold  | Threshold 2 °C + High Pop | 0 (0 to 0)             |
| DM  | Moderate cold | Threshold 2 °C + High Pop | -1.29 (-2.58 to 0.21)  |
| DM  | Moderate heat | Threshold 2 °C + High Pop | 4.11 (-3.45 to 9.86)   |
| DM  | Extreme heat  | Threshold 2 °C + High Pop | 1.88 (-0.29 to 3.21)   |
| CVD | Total         | Threshold 2 °C + High Pop | -1.73 (-5.06 to 1.56)  |
| CVD | Extreme cold  | Threshold 2 °C + High Pop | 0 (0 to 0)             |
| CVD | Moderate cold | Threshold 2 °C + High Pop | -2.71 (-5.67 to 0.56)  |
| CVD | Moderate heat | Threshold 2 °C + High Pop | 0.98 (-0.85 to 2.31)   |
| CVD | Extreme heat  | Threshold 2 °C + High Pop | 0.77 (-0.61 to 1.73)   |
| HD  | Total         | Threshold 2 °C + High Pop | 4.41 (0.38 to 7.44)    |
| HD  | Extreme cold  | Threshold 2 °C + High Pop | 0 (0 to 0)             |
| HD  | Moderate cold | Threshold 2 °C + High Pop | -0.03 (-0.29 to 0.27)  |
| HD  | Moderate heat | Threshold 2 °C + High Pop | 4.44 (0.33 to 7.52)    |
| HD  | Extreme heat  | Threshold 2 °C + High Pop | 0.96 (-0.53 to 1.9)    |
| RD  | Total         | Threshold 2 °C + High Pop | 5.24 (0.2 to 9.02)     |
| RD  | Extreme cold  | Threshold 2 °C + High Pop | 0 (0 to 0)             |
| RD  | Moderate cold | Threshold 2 °C + High Pop | -1.69 (-2.68 to -0.55) |
| RD  | Moderate heat | Threshold 2 °C + High Pop | 6.93 (1.99 to 10.49)   |
| RD  | Extreme heat  | Threshold 2 °C + High Pop | 1.45 (-0.28 to 2.42)   |
| All | Total         | Threshold 2 °C + Med Pop  | 1.89 (-0.65 to 4)      |
| All | Extreme cold  | Threshold 2 °C + Med Pop  | 0 (0 to 0)             |
| All | Moderate cold | Threshold 2 °C + Med Pop  | -0.46 (-0.92 to 0.03)  |
| All | Moderate heat | Threshold 2 °C + Med Pop  | 2.36 (-0.2 to 4.45)    |
| All | Extreme heat  | Threshold 2 °C + Med Pop  | 0.87 (-0.01 to 1.5)    |
| DM  | Total         | Threshold 2 °C + Med Pop  | 2.57 (-4.97 to 8.66)   |
| DM  | Extreme cold  | Threshold 2 °C + Med Pop  | 0 (0 to 0)             |
| DM  | Moderate cold | Threshold 2 °C + Med Pop  | -1.25 (-2.54 to 0.32)  |
| DM  | Moderate heat | Threshold 2 °C + Med Pop  | 3.82 (-4.28 to 9.76)   |

|     |               |                          |                        |
|-----|---------------|--------------------------|------------------------|
| DM  | Extreme heat  | Threshold 2 °C + Med Pop | 1.79 (−0.61 to 3.17)   |
| CVD | Total         | Threshold 2 °C + Med Pop | −1.73 (−5.06 to 1.56)  |
| CVD | Extreme cold  | Threshold 2 °C + Med Pop | 0 (0 to 0)             |
| CVD | Moderate cold | Threshold 2 °C + Med Pop | −2.71 (−5.67 to 0.56)  |
| CVD | Moderate heat | Threshold 2 °C + Med Pop | 0.98 (−0.85 to 2.31)   |
| CVD | Extreme heat  | Threshold 2 °C + Med Pop | 0.77 (−0.61 to 1.73)   |
| HD  | Total         | Threshold 2 °C + Med Pop | 4.24 (0.16 to 7.32)    |
| HD  | Extreme cold  | Threshold 2 °C + Med Pop | 0 (0 to 0)             |
| HD  | Moderate cold | Threshold 2 °C + Med Pop | −0.06 (−0.38 to 0.33)  |
| HD  | Moderate heat | Threshold 2 °C + Med Pop | 4.3 (0.16 to 7.41)     |
| HD  | Extreme heat  | Threshold 2 °C + Med Pop | 0.95 (−0.55 to 1.88)   |
| RD  | Total         | Threshold 2 °C + Med Pop | 5.37 (0.33 to 9.13)    |
| RD  | Extreme cold  | Threshold 2 °C + Med Pop | 0 (0 to 0)             |
| RD  | Moderate cold | Threshold 2 °C + Med Pop | −1.63 (−2.61 to −0.49) |
| RD  | Moderate heat | Threshold 2 °C + Med Pop | 7 (2.07 to 10.58)      |
| RD  | Extreme heat  | Threshold 2 °C + Med Pop | 1.45 (−0.3 to 2.41)    |
| All | Total         | Threshold 2 °C + Low Pop | 2.66 (−0.71 to 5.35)   |
| All | Extreme cold  | Threshold 2 °C + Low Pop | 0 (0 to 0)             |
| All | Moderate cold | Threshold 2 °C + Low Pop | −0.47 (−0.94 to 0.04)  |
| All | Moderate heat | Threshold 2 °C + Low Pop | 3.14 (−0.16 to 5.87)   |
| All | Extreme heat  | Threshold 2 °C + Low Pop | 1.23 (−0.02 to 2.11)   |
| DM  | Total         | Threshold 2 °C + Low Pop | 2.64 (−4.89 to 8.71)   |
| DM  | Extreme cold  | Threshold 2 °C + Low Pop | 0 (0 to 0)             |
| DM  | Moderate cold | Threshold 2 °C + Low Pop | −1.24 (−2.5 to 0.28)   |
| DM  | Moderate heat | Threshold 2 °C + Low Pop | 3.88 (−4.15 to 9.82)   |
| DM  | Extreme heat  | Threshold 2 °C + Low Pop | 1.8 (−0.6 to 3.18)     |
| CVD | Total         | Threshold 2 °C + Low Pop | −1.77 (−5.1 to 1.5)    |
| CVD | Extreme cold  | Threshold 2 °C + Low Pop | 0 (0 to 0)             |
| CVD | Moderate cold | Threshold 2 °C + Low Pop | −2.76 (−5.71 to 0.52)  |
| CVD | Moderate heat | Threshold 2 °C + Low Pop | 0.98 (−0.85 to 2.31)   |
| CVD | Extreme heat  | Threshold 2 °C + Low Pop | 0.77 (−0.61 to 1.73)   |
| HD  | Total         | Threshold 2 °C + Low Pop | 4.24 (0.16 to 7.32)    |
| HD  | Extreme cold  | Threshold 2 °C + Low Pop | 0 (0 to 0)             |
| HD  | Moderate cold | Threshold 2 °C + Low Pop | −0.05 (−0.38 to 0.33)  |
| HD  | Moderate heat | Threshold 2 °C + Low Pop | 4.29 (0.15 to 7.4)     |
| HD  | Extreme heat  | Threshold 2 °C + Low Pop | 0.94 (−0.55 to 1.88)   |
| RD  | Total         | Threshold 2 °C + Low Pop | 5.38 (0.35 to 9.13)    |
| RD  | Extreme cold  | Threshold 2 °C + Low Pop | 0 (0 to 0)             |
| RD  | Moderate cold | Threshold 2 °C + Low Pop | −1.64 (−2.62 to −0.49) |
| RD  | Moderate heat | Threshold 2 °C + Low Pop | 7.02 (2.08 to 10.58)   |
| RD  | Extreme heat  | Threshold 2 °C + Low Pop | 1.45 (−0.29 to 2.42)   |
| All | Total         | Threshold 3 °C only      | 2.77 (−0.28 to 5.53)   |
| All | Extreme cold  | Threshold 3 °C only      | 0 (0 to 0)             |
| All | Moderate cold | Threshold 3 °C only      | −0.49 (−0.95 to 0.04)  |
| All | Moderate heat | Threshold 3 °C only      | 3.26 (0.11 to 6)       |
| All | Extreme heat  | Threshold 3 °C only      | 1.27 (0.09 to 2.16)    |
| DM  | Total         | Threshold 3 °C only      | 3.65 (−6.4 to 11.43)   |

|     |               |                           |                        |
|-----|---------------|---------------------------|------------------------|
| DM  | Extreme cold  | Threshold 3 °C only       | 0 (0 to 0)             |
| DM  | Moderate cold | Threshold 3 °C only       | -1.24 (-2.56 to 0.38)  |
| DM  | Moderate heat | Threshold 3 °C only       | 4.88 (-5.49 to 12.38)  |
| DM  | Extreme heat  | Threshold 3 °C only       | 2.5 (-0.77 to 4.35)    |
| CVD | Total         | Threshold 3 °C only       | -1.72 (-7.2 to 3.43)   |
| CVD | Extreme cold  | Threshold 3 °C only       | 0 (0 to 0)             |
| CVD | Moderate cold | Threshold 3 °C only       | -3.78 (-8.31 to 1.17)  |
| CVD | Moderate heat | Threshold 3 °C only       | 2.07 (-1.7 to 4.73)    |
| CVD | Extreme heat  | Threshold 3 °C only       | 1.59 (-1.23 to 3.48)   |
| HD  | Total         | Threshold 3 °C only       | 5.42 (0.14 to 9.36)    |
| HD  | Extreme cold  | Threshold 3 °C only       | 0 (0 to 0)             |
| HD  | Moderate cold | Threshold 3 °C only       | -0.07 (-0.42 to 0.34)  |
| HD  | Moderate heat | Threshold 3 °C only       | 5.49 (0.3 to 9.41)     |
| HD  | Extreme heat  | Threshold 3 °C only       | 1.35 (-0.82 to 2.66)   |
| RD  | Total         | Threshold 3 °C only       | 7.45 (0.82 to 12.15)   |
| RD  | Extreme cold  | Threshold 3 °C only       | 0 (0 to 0)             |
| RD  | Moderate cold | Threshold 3 °C only       | -1.65 (-2.66 to -0.47) |
| RD  | Moderate heat | Threshold 3 °C only       | 9.1 (2.72 to 13.76)    |
| RD  | Extreme heat  | Threshold 3 °C only       | 1.96 (-0.54 to 3.3)    |
| All | Total         | Threshold 3 °C + High Pop | 2.58 (-0.81 to 5.27)   |
| All | Extreme cold  | Threshold 3 °C + High Pop | 0 (0 to 0)             |
| All | Moderate cold | Threshold 3 °C + High Pop | -0.48 (-0.95 to 0.03)  |
| All | Moderate heat | Threshold 3 °C + High Pop | 3.06 (-0.24 to 5.82)   |
| All | Extreme heat  | Threshold 3 °C + High Pop | 1.22 (-0.04 to 2.09)   |
| DM  | Total         | Threshold 3 °C + High Pop | 4.17 (-5.76 to 11.19)  |
| DM  | Extreme cold  | Threshold 3 °C + High Pop | 0 (0 to 0)             |
| DM  | Moderate cold | Threshold 3 °C + High Pop | -1.31 (-2.63 to 0.23)  |
| DM  | Moderate heat | Threshold 3 °C + High Pop | 5.49 (-4.02 to 12.82)  |
| DM  | Extreme heat  | Threshold 3 °C + High Pop | 2.67 (-0.37 to 4.42)   |
| CVD | Total         | Threshold 3 °C + High Pop | -2.01 (-7.44 to 3.07)  |
| CVD | Extreme cold  | Threshold 3 °C + High Pop | 0 (0 to 0)             |
| CVD | Moderate cold | Threshold 3 °C + High Pop | -4.05 (-8.54 to 0.86)  |
| CVD | Moderate heat | Threshold 3 °C + High Pop | 2.04 (-1.76 to 4.71)   |
| CVD | Extreme heat  | Threshold 3 °C + High Pop | 1.57 (-1.27 to 3.46)   |
| HD  | Total         | Threshold 3 °C + High Pop | 5.5 (0.22 to 9.45)     |
| HD  | Extreme cold  | Threshold 3 °C + High Pop | 0 (0 to 0)             |
| HD  | Moderate cold | Threshold 3 °C + High Pop | -0.03 (-0.29 to 0.27)  |
| HD  | Moderate heat | Threshold 3 °C + High Pop | 5.53 (0.3 to 9.42)     |
| HD  | Extreme heat  | Threshold 3 °C + High Pop | 1.32 (-0.83 to 2.65)   |
| RD  | Total         | Threshold 3 °C + High Pop | 7.35 (0.72 to 12.07)   |
| RD  | Extreme cold  | Threshold 3 °C + High Pop | 0 (0 to 0)             |
| RD  | Moderate cold | Threshold 3 °C + High Pop | -1.73 (-2.73 to -0.55) |
| RD  | Moderate heat | Threshold 3 °C + High Pop | 9.08 (2.75 to 13.71)   |
| RD  | Extreme heat  | Threshold 3 °C + High Pop | 1.99 (-0.46 to 3.31)   |
| All | Total         | Threshold 3 °C + Med Pop  | 2.67 (-0.7 to 5.36)    |
| All | Extreme cold  | Threshold 3 °C + Med Pop  | 0 (0 to 0)             |
| All | Moderate cold | Threshold 3 °C + Med Pop  | -0.47 (-0.94 to 0.04)  |

|     |               |                          |                        |
|-----|---------------|--------------------------|------------------------|
| All | Moderate heat | Threshold 3 °C + Med Pop | 3.15 (−0.15 to 5.88)   |
| All | Extreme heat  | Threshold 3 °C + Med Pop | 1.24 (−0.02 to 2.11)   |
| DM  | Total         | Threshold 3 °C + Med Pop | 3.85 (−6.04 to 11.56)  |
| DM  | Extreme cold  | Threshold 3 °C + Med Pop | 0 (0 to 0)             |
| DM  | Moderate cold | Threshold 3 °C + Med Pop | −1.27 (−2.58 to 0.33)  |
| DM  | Moderate heat | Threshold 3 °C + Med Pop | 5.12 (−5.11 to 12.54)  |
| DM  | Extreme heat  | Threshold 3 °C + Med Pop | 2.54 (−0.7 to 4.37)    |
| CVD | Total         | Threshold 3 °C + Med Pop | −1.95 (−6.33 to 2.23)  |
| CVD | Extreme cold  | Threshold 3 °C + Med Pop | 0 (0 to 0)             |
| CVD | Moderate cold | Threshold 3 °C + Med Pop | −3.39 (−7.15 to 0.72)  |
| CVD | Moderate heat | Threshold 3 °C + Med Pop | 1.44 (−1.24 to 3.36)   |
| CVD | Extreme heat  | Threshold 3 °C + Med Pop | 1.11 (−0.89 to 2.46)   |
| HD  | Total         | Threshold 3 °C + Med Pop | 5.31 (0.01 to 9.27)    |
| HD  | Extreme cold  | Threshold 3 °C + Med Pop | 0 (0 to 0)             |
| HD  | Moderate cold | Threshold 3 °C + Med Pop | −0.06 (−0.39 to 0.33)  |
| HD  | Moderate heat | Threshold 3 °C + Med Pop | 5.37 (0.15 to 9.3)     |
| HD  | Extreme heat  | Threshold 3 °C + Med Pop | 1.31 (−0.87 to 2.63)   |
| RD  | Total         | Threshold 3 °C + Med Pop | 7.5 (0.83 to 12.2)     |
| RD  | Extreme cold  | Threshold 3 °C + Med Pop | 0 (0 to 0)             |
| RD  | Moderate cold | Threshold 3 °C + Med Pop | −1.66 (−2.67 to −0.48) |
| RD  | Moderate heat | Threshold 3 °C + Med Pop | 9.16 (2.8 to 13.79)    |
| RD  | Extreme heat  | Threshold 3 °C + Med Pop | 1.98 (−0.51 to 3.31)   |
| All | Total         | Threshold 3 °C + Low Pop | 2.66 (−0.71 to 5.35)   |
| All | Extreme cold  | Threshold 3 °C + Low Pop | 0 (0 to 0)             |
| All | Moderate cold | Threshold 3 °C + Low Pop | −0.47 (−0.94 to 0.04)  |
| All | Moderate heat | Threshold 3 °C + Low Pop | 3.14 (−0.16 to 5.87)   |
| All | Extreme heat  | Threshold 3 °C + Low Pop | 1.23 (−0.02 to 2.11)   |
| DM  | Total         | Threshold 3 °C + Low Pop | 3.94 (−5.91 to 11.61)  |
| DM  | Extreme cold  | Threshold 3 °C + Low Pop | 0 (0 to 0)             |
| DM  | Moderate cold | Threshold 3 °C + Low Pop | −1.26 (−2.55 to 0.29)  |
| DM  | Moderate heat | Threshold 3 °C + Low Pop | 5.2 (−4.98 to 12.61)   |
| DM  | Extreme heat  | Threshold 3 °C + Low Pop | 2.56 (−0.65 to 4.39)   |
| CVD | Total         | Threshold 3 °C + Low Pop | −2 (−6.37 to 2.17)     |
| CVD | Extreme cold  | Threshold 3 °C + Low Pop | 0 (0 to 0)             |
| CVD | Moderate cold | Threshold 3 °C + Low Pop | −3.44 (−7.19 to 0.66)  |
| CVD | Moderate heat | Threshold 3 °C + Low Pop | 1.44 (−1.24 to 3.36)   |
| CVD | Extreme heat  | Threshold 3 °C + Low Pop | 1.11 (−0.89 to 2.46)   |
| HD  | Total         | Threshold 3 °C + Low Pop | 5.31 (0.01 to 9.26)    |
| HD  | Extreme cold  | Threshold 3 °C + Low Pop | 0 (0 to 0)             |
| HD  | Moderate cold | Threshold 3 °C + Low Pop | −0.05 (−0.38 to 0.34)  |
| HD  | Moderate heat | Threshold 3 °C + Low Pop | 5.36 (0.14 to 9.29)    |
| HD  | Extreme heat  | Threshold 3 °C + Low Pop | 1.3 (−0.88 to 2.62)    |
| RD  | Total         | Threshold 3 °C + Low Pop | 7.51 (0.86 to 12.21)   |
| RD  | Extreme cold  | Threshold 3 °C + Low Pop | 0 (0 to 0)             |
| RD  | Moderate cold | Threshold 3 °C + Low Pop | −1.67 (−2.68 to −0.49) |
| RD  | Moderate heat | Threshold 3 °C + Low Pop | 9.18 (2.84 to 13.81)   |
| RD  | Extreme heat  | Threshold 3 °C + Low Pop | 1.98 (−0.49 to 3.31)   |

|     |               |                           |                        |
|-----|---------------|---------------------------|------------------------|
| All | Total         | Threshold 4 °C only       | 3.56 (−0.25 to 6.88)   |
| All | Extreme cold  | Threshold 4 °C only       | 0 (0 to 0)             |
| All | Moderate cold | Threshold 4 °C only       | −0.49 (−0.95 to 0.04)  |
| All | Moderate heat | Threshold 4 °C only       | 4.05 (0.13 to 7.39)    |
| All | Extreme heat  | Threshold 4 °C only       | 1.79 (0.16 to 3.03)    |
| DM  | Total         | Threshold 4 °C only       | 4.81 (−7.74 to 13.99)  |
| DM  | Extreme cold  | Threshold 4 °C only       | 0 (0 to 0)             |
| DM  | Moderate cold | Threshold 4 °C only       | −1.24 (−2.57 to 0.38)  |
| DM  | Moderate heat | Threshold 4 °C only       | 6.05 (−6.66 to 15.04)  |
| DM  | Extreme heat  | Threshold 4 °C only       | 3.51 (−1.08 to 6.02)   |
| CVD | Total         | Threshold 4 °C only       | −1.72 (−7.2 to 3.43)   |
| CVD | Extreme cold  | Threshold 4 °C only       | 0 (0 to 0)             |
| CVD | Moderate cold | Threshold 4 °C only       | −3.78 (−8.31 to 1.17)  |
| CVD | Moderate heat | Threshold 4 °C only       | 2.07 (−1.7 to 4.73)    |
| CVD | Extreme heat  | Threshold 4 °C only       | 1.59 (−1.23 to 3.48)   |
| HD  | Total         | Threshold 4 °C only       | 6.35 (−0.11 to 11.1)   |
| HD  | Extreme cold  | Threshold 4 °C only       | 0 (0 to 0)             |
| HD  | Moderate cold | Threshold 4 °C only       | 0 (0 to 0)             |
| HD  | Moderate heat | Threshold 4 °C only       | 6.42 (−0.16 to 11.27)  |
| HD  | Extreme heat  | Threshold 4 °C only       | 1.88 (−1.26 to 3.72)   |
| RD  | Total         | Threshold 4 °C only       | 9.41 (1.4 to 14.99)    |
| RD  | Extreme cold  | Threshold 4 °C only       | 0 (0 to 0)             |
| RD  | Moderate cold | Threshold 4 °C only       | −1.66 (−2.68 to −0.47) |
| RD  | Moderate heat | Threshold 4 °C only       | 11.08 (3.03 to 16.51)  |
| RD  | Extreme heat  | Threshold 4 °C only       | 2.71 (−0.91 to 4.56)   |
| All | Total         | Threshold 4 °C + High Pop | 3.33 (−0.73 to 6.58)   |
| All | Extreme cold  | Threshold 4 °C + High Pop | 0 (0 to 0)             |
| All | Moderate cold | Threshold 4 °C + High Pop | −0.48 (−0.95 to 0.04)  |
| All | Moderate heat | Threshold 4 °C + High Pop | 3.81 (−0.27 to 7.14)   |
| All | Extreme heat  | Threshold 4 °C + High Pop | 1.72 (−0.04 to 2.94)   |
| DM  | Total         | Threshold 4 °C + High Pop | 5.43 (−6.62 to 13.77)  |
| DM  | Extreme cold  | Threshold 4 °C + High Pop | 0 (0 to 0)             |
| DM  | Moderate cold | Threshold 4 °C + High Pop | −1.32 (−2.65 to 0.23)  |
| DM  | Moderate heat | Threshold 4 °C + High Pop | 6.75 (−5.06 to 15.32)  |
| DM  | Extreme heat  | Threshold 4 °C + High Pop | 3.74 (−0.5 to 6.11)    |
| CVD | Total         | Threshold 4 °C + High Pop | −2.43 (−7.81 to 2.63)  |
| CVD | Extreme cold  | Threshold 4 °C + High Pop | 0 (0 to 0)             |
| CVD | Moderate cold | Threshold 4 °C + High Pop | −4.39 (−8.85 to 0.52)  |
| CVD | Moderate heat | Threshold 4 °C + High Pop | 1.96 (−1.9 to 4.64)    |
| CVD | Extreme heat  | Threshold 4 °C + High Pop | 1.51 (−1.37 to 3.4)    |
| HD  | Total         | Threshold 4 °C + High Pop | 6.42 (0.02 to 11.17)   |
| HD  | Extreme cold  | Threshold 4 °C + High Pop | 0 (0 to 0)             |
| HD  | Moderate cold | Threshold 4 °C + High Pop | 0 (0 to 0)             |
| HD  | Moderate heat | Threshold 4 °C + High Pop | 6.45 (0 to 11.3)       |
| HD  | Extreme heat  | Threshold 4 °C + High Pop | 1.84 (−1.26 to 3.7)    |
| RD  | Total         | Threshold 4 °C + High Pop | 9.31 (1.37 to 14.86)   |
| RD  | Extreme cold  | Threshold 4 °C + High Pop | 0 (0 to 0)             |



|     |               |                           |                        |
|-----|---------------|---------------------------|------------------------|
| RD  | Moderate cold | Threshold 4 °C + High Pop | -1.74 (-2.75 to -0.55) |
| RD  | Moderate heat | Threshold 4 °C + High Pop | 11.05 (3.08 to 16.56)  |
| RD  | Extreme heat  | Threshold 4 °C + High Pop | 2.77 (-0.78 to 4.59)   |
| All | Total         | Threshold 4 °C + Med Pop  | 3.44 (-0.6 to 6.67)    |
| All | Extreme cold  | Threshold 4 °C + Med Pop  | 0 (0 to 0)             |
| All | Moderate cold | Threshold 4 °C + Med Pop  | -0.47 (-0.94 to 0.04)  |
| All | Moderate heat | Threshold 4 °C + Med Pop  | 3.91 (-0.19 to 7.22)   |
| All | Extreme heat  | Threshold 4 °C + Med Pop  | 1.74 (-0.01 to 2.97)   |
| DM  | Total         | Threshold 4 °C + Med Pop  | 5.05 (-7.38 to 14.22)  |
| DM  | Extreme cold  | Threshold 4 °C + Med Pop  | 0 (0 to 0)             |
| DM  | Moderate cold | Threshold 4 °C + Med Pop  | -1.27 (-2.6 to 0.34)   |
| DM  | Moderate heat | Threshold 4 °C + Med Pop  | 6.32 (-6.36 to 15.23)  |
| DM  | Extreme heat  | Threshold 4 °C + Med Pop  | 3.56 (-0.96 to 6.05)   |
| CVD | Total         | Threshold 4 °C + Med Pop  | -2.01 (-7.44 to 3.07)  |
| CVD | Extreme cold  | Threshold 4 °C + Med Pop  | 0 (0 to 0)             |
| CVD | Moderate cold | Threshold 4 °C + Med Pop  | -4.05 (-8.54 to 0.86)  |
| CVD | Moderate heat | Threshold 4 °C + Med Pop  | 2.04 (-1.76 to 4.71)   |
| CVD | Extreme heat  | Threshold 4 °C + Med Pop  | 1.57 (-1.27 to 3.46)   |
| HD  | Total         | Threshold 4 °C + Med Pop  | 6.22 (-0.25 to 11)     |
| HD  | Extreme cold  | Threshold 4 °C + Med Pop  | 0 (0 to 0)             |
| HD  | Moderate cold | Threshold 4 °C + Med Pop  | 0 (0 to 0)             |
| HD  | Moderate heat | Threshold 4 °C + Med Pop  | 6.28 (-0.22 to 11.11)  |
| HD  | Extreme heat  | Threshold 4 °C + Med Pop  | 1.82 (-1.35 to 3.68)   |
| RD  | Total         | Threshold 4 °C + Med Pop  | 9.47 (1.51 to 15.03)   |
| RD  | Extreme cold  | Threshold 4 °C + Med Pop  | 0 (0 to 0)             |
| RD  | Moderate cold | Threshold 4 °C + Med Pop  | -1.67 (-2.69 to -0.48) |
| RD  | Moderate heat | Threshold 4 °C + Med Pop  | 11.14 (3.13 to 16.59)  |
| RD  | Extreme heat  | Threshold 4 °C + Med Pop  | 2.74 (-0.86 to 4.58)   |
| All | Total         | Threshold 4 °C + Low Pop  | 3.43 (-0.62 to 6.66)   |
| All | Extreme cold  | Threshold 4 °C + Low Pop  | 0 (0 to 0)             |
| All | Moderate cold | Threshold 4 °C + Low Pop  | -0.47 (-0.95 to 0.04)  |
| All | Moderate heat | Threshold 4 °C + Low Pop  | 3.9 (-0.2 to 7.2)      |
| All | Extreme heat  | Threshold 4 °C + Low Pop  | 1.74 (-0.02 to 2.97)   |
| DM  | Total         | Threshold 4 °C + Low Pop  | 5.15 (-7.21 to 14.26)  |
| DM  | Extreme cold  | Threshold 4 °C + Low Pop  | 0 (0 to 0)             |
| DM  | Moderate cold | Threshold 4 °C + Low Pop  | -1.27 (-2.56 to 0.3)   |
| DM  | Moderate heat | Threshold 4 °C + Low Pop  | 6.42 (-6.3 to 15.29)   |
| DM  | Extreme heat  | Threshold 4 °C + Low Pop  | 3.59 (-0.91 to 6.07)   |
| CVD | Total         | Threshold 4 °C + Low Pop  | -2.07 (-7.48 to 3)     |
| CVD | Extreme cold  | Threshold 4 °C + Low Pop  | 0 (0 to 0)             |
| CVD | Moderate cold | Threshold 4 °C + Low Pop  | -4.11 (-8.59 to 0.79)  |
| CVD | Moderate heat | Threshold 4 °C + Low Pop  | 2.04 (-1.75 to 4.7)    |
| CVD | Extreme heat  | Threshold 4 °C + Low Pop  | 1.57 (-1.26 to 3.46)   |
| HD  | Total         | Threshold 4 °C + Low Pop  | 6.21 (-0.26 to 10.99)  |
| HD  | Extreme cold  | Threshold 4 °C + Low Pop  | 0 (0 to 0)             |
| HD  | Moderate cold | Threshold 4 °C + Low Pop  | 0 (0 to 0)             |
| HD  | Moderate heat | Threshold 4 °C + Low Pop  | 6.26 (-0.23 to 11.09)  |

|    |               |                          |                        |
|----|---------------|--------------------------|------------------------|
| HD | Extreme heat  | Threshold 4 °C + Low Pop | 1.81 (−1.37 to 3.68)   |
| RD | Total         | Threshold 4 °C + Low Pop | 9.49 (1.54 to 15.03)   |
| RD | Extreme cold  | Threshold 4 °C + Low Pop | 0 (0 to 0)             |
| RD | Moderate cold | Threshold 4 °C + Low Pop | −1.67 (−2.69 to −0.49) |
| RD | Moderate heat | Threshold 4 °C + Low Pop | 11.16 (3.17 to 16.61)  |
| RD | Extreme heat  | Threshold 4 °C + Low Pop | 2.75 (−0.84 to 4.58)   |

---
